# Supplementary material for: A CeO 2 /CuCo 2 S 4 composite for peroxymonosulfate activation to enhance elimination of tetracycline hydrochloride in wastewater
Source: Royal Society of Chemistry journal article supplement (doi:10.1039/d5nj04055h), 2025-12-23
Supplement: d5nj04055h1.pdf [file d5nj04055h1.pdf]

## Supplementary material

### **CeO<sub>2</sub>/CuCo<sub>2</sub>S<sub>4</sub> composite for peroxymonosulfate activation to enhanced elimination of tetracycline hydrochloride**

**Qing Lin, Dedong Sun\*, Hongchao Ma, Guowen Wang, Xinxin Zhang, Jun Hao**

School of Light Industry and Chemical Engineering, Dalian Polytechnic University,

1# Qing Gong Yuan, Dalian 116034, PR China

\* Corresponding author.

E-mail address: [sundd@dlpu.edu.cn](mailto:sundd@dlpu.edu.cn)

#### Text S1. Reagents

All chemicals used in this study were of analytical grade and used without further purification. Anhydrous citric acid (C<sub>6</sub>H<sub>8</sub>O<sub>7</sub>), potassium peroxymonosulfate (KHSO<sub>5</sub>·0.5KHSO<sub>4</sub>·0.5K<sub>2</sub>SO<sub>4</sub>), and L-histidine (C<sub>6</sub>H<sub>9</sub>N<sub>3</sub>O<sub>2</sub>) were purchased from Aladdin Biochemical Technology Co., Ltd (Shanghai, China). Tetracycline hydrochloride (TCH, C<sub>22</sub>H<sub>25</sub>ClN<sub>2</sub>O<sub>8</sub>), copper(II) nitrate trihydrate (Cu(NO<sub>3</sub>)<sub>2</sub>·3H<sub>2</sub>O), cobalt(II) nitrate hexahydrate (Co(NO<sub>3</sub>)<sub>2</sub>·6H<sub>2</sub>O), cerium(III) nitrate hexahydrate (Ce(NO<sub>3</sub>)<sub>3</sub>·6H<sub>2</sub>O), p-benzoquinone (p-BQ, C<sub>6</sub>H<sub>4</sub>O<sub>2</sub>), potassium dihydrogen phosphate (KH<sub>2</sub>PO<sub>4</sub>), humic acid (HA), sodium thiosulfate (Na<sub>2</sub>S<sub>2</sub>O<sub>3</sub>), and sodium nitrate (NaNO<sub>3</sub>) were supplied by Macklin Biochemical Co., Ltd (Shanghai, China). Thiourea (CH<sub>4</sub>N<sub>2</sub>S), ethylene glycol (C<sub>2</sub>H<sub>6</sub>O<sub>2</sub>), tert-butanol (TBA, C<sub>4</sub>H<sub>10</sub>O), ethanol (EtOH, C<sub>2</sub>H<sub>5</sub>OH), potassium sulfate (K<sub>2</sub>SO<sub>4</sub>), sodium bicarbonate (NaHCO<sub>3</sub>), bisphenol A (BPA), phenol (PE), and sulfamethoxazole (SMX) were obtained from Kermel Chemical Reagent Co., Ltd (Tianjin, China). Potassium chloride (KCl) was purchased from Tianjin Guangfu Technology Development Co., Ltd (Tianjin, China). Rhodamine B (RhB) and methylene blue (MB) were provided by Guangfu Fine Chemical Research Institute (Tianjin, China). All solutions were prepared with deionized water (DIW).

## Text S2. Characterization and measurement

The crystal structure of the samples was analyzed using an X-ray diffractometer (XRD, SHIMADZU X-6100, Japan). Surface morphology and elemental composition were characterized by field-emission scanning electron microscopy (SEM, JSM-7800F, Japan) coupled with energy-dispersive spectroscopy (EDS, X-Max50, UK). The chemical states of elements were compared before and after reaction using X-ray photoelectron spectroscopy (XPS, Thermo Scientific K-Alpha, USA), while the reaction species during the reaction were detected by electron paramagnetic resonance spectroscopy (EPR, Bruker EMXplus, Germany). Electrochemical performance was tested using an electrochemical workstation (CS315H, Wuhan, China). The TCH concentration was analyzed by a UV-visible spectrophotometer (UV-vis, MAPADA UV-1150, China). The pH value of the solution was determined using a pH meter (phs-25-3E, China). The Brunauer-Emmett-Teller (BET) surface area, pore size, and pore volume were determined on Quantachrome (NOVA200E, United States) at 77.35K. The total organic carbon (TOC) concentrations were tested using the TOC-VCPH Total Organic Carbon Analyzer (Shimadzu, Japan).

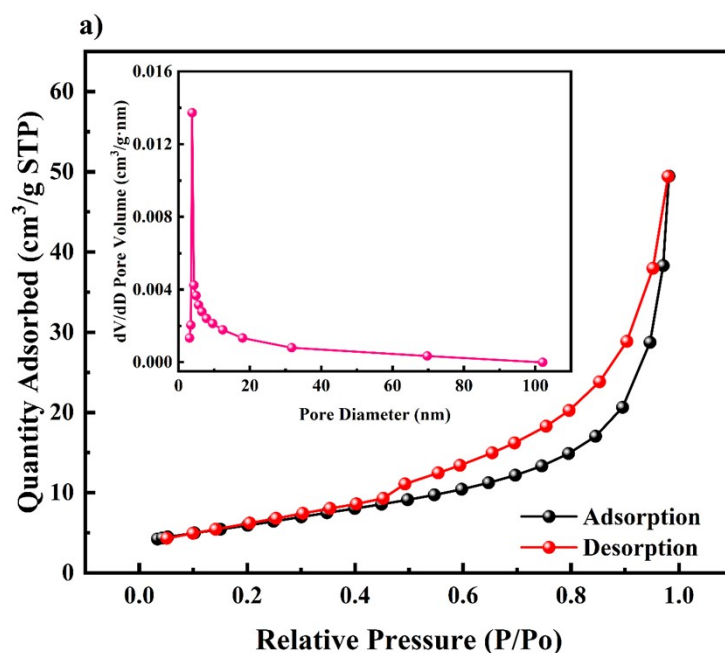

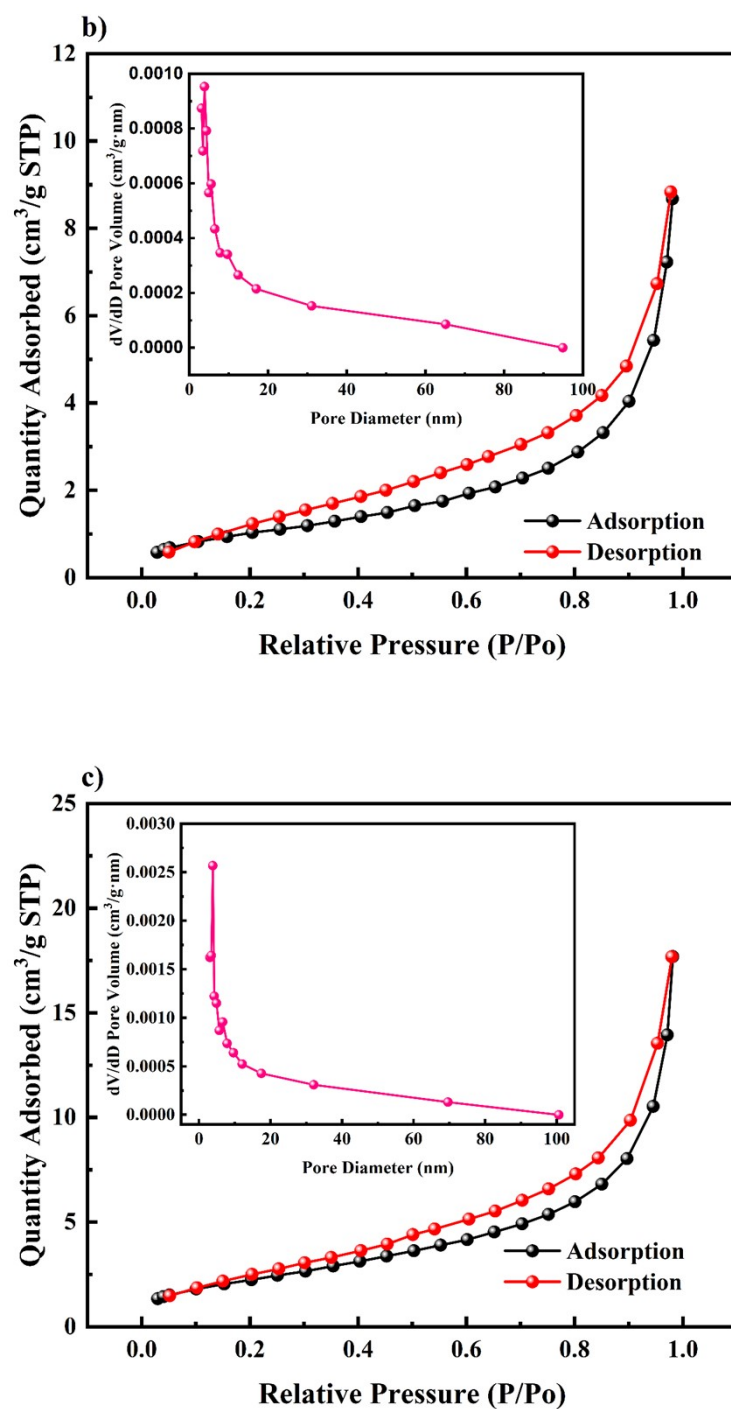

Fig. S1.  $\text{N}_2$  sorption–desorption isotherms and the corresponding pore size distribution curves of  $\text{CeO}_2$  (a),  $\text{CuCo}_2\text{S}_4$  (b), and 0.5-  $\text{CeO}_2/\text{CuCo}_2\text{S}_4$  (c).

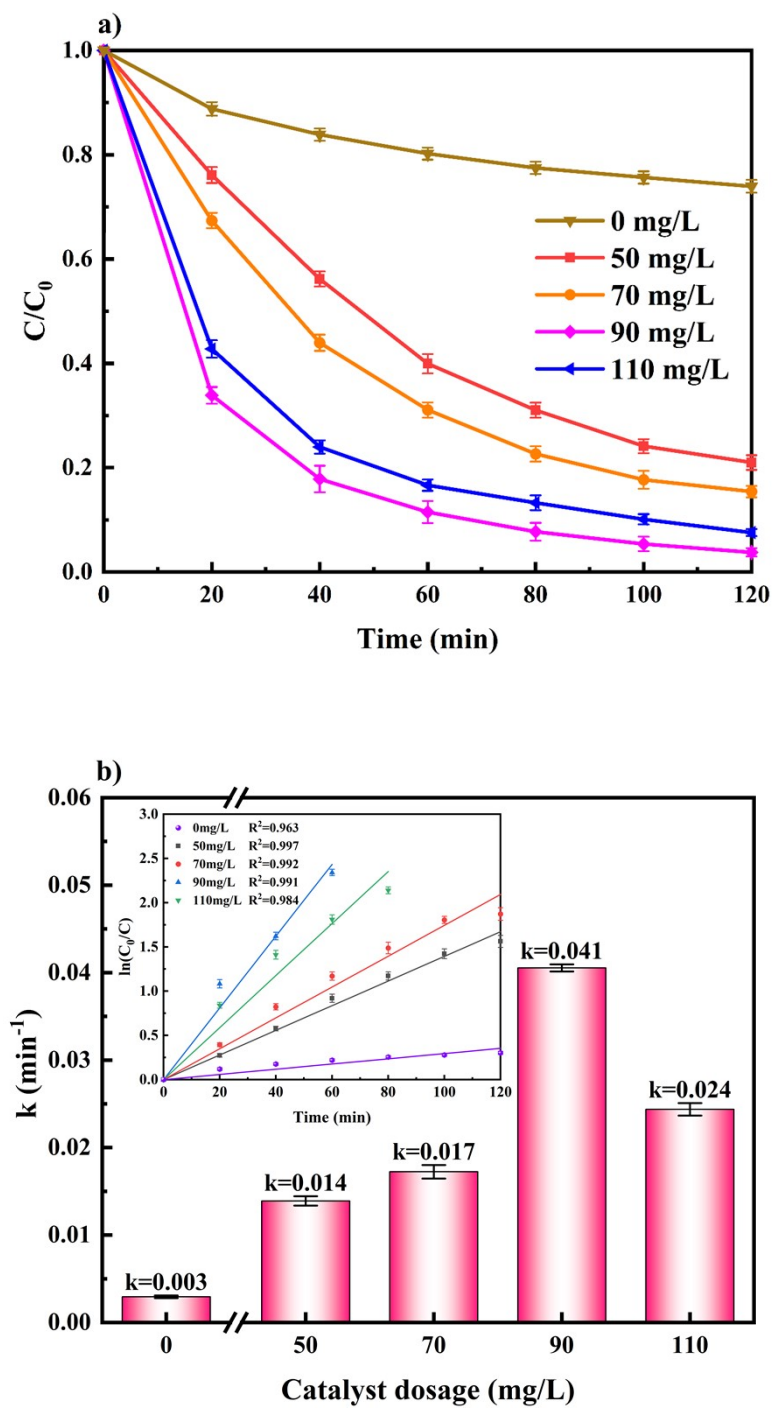

Fig. S2. (a) Effect of catalyst concentration on TCH degradation efficiency, and (b) its reaction kinetics (Experimental conditions: [TCH] = 15 mg/L, [PMS] = 0.9 mM, initial pH unadjusted (5.6), temperature = 20°C.)

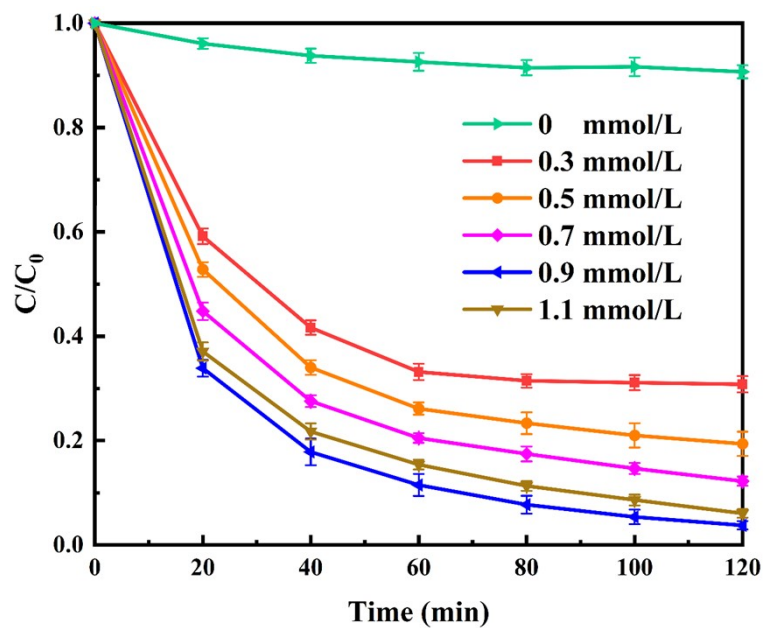

Fig. S3. Effect of PMS concentration on the efficiency of TCH degradation (Experimental conditions: [TCH] = 15 mg/L, [0.5-CeO<sub>2</sub>/CuCo<sub>2</sub>S<sub>4</sub>] = 90 mg/L, initial pH unadjusted (5.6), and temperature = 20°C.)

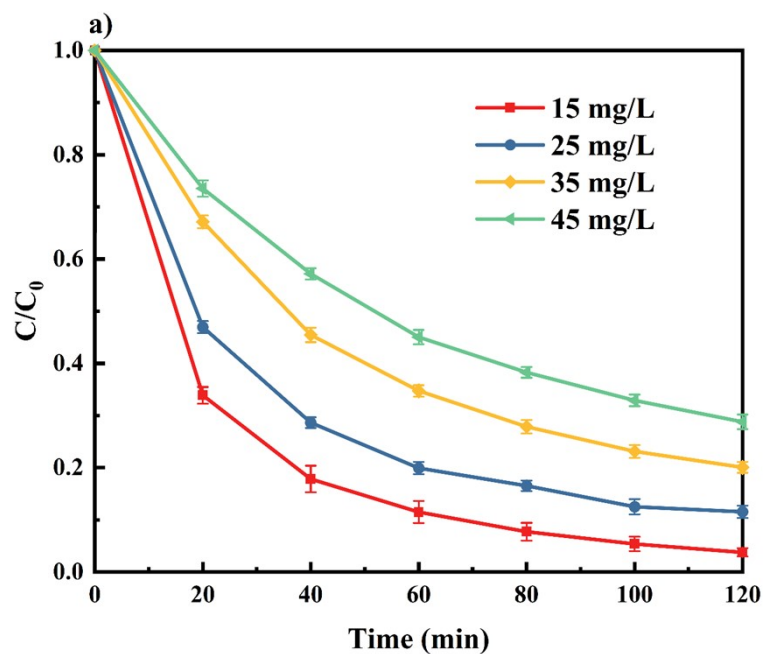

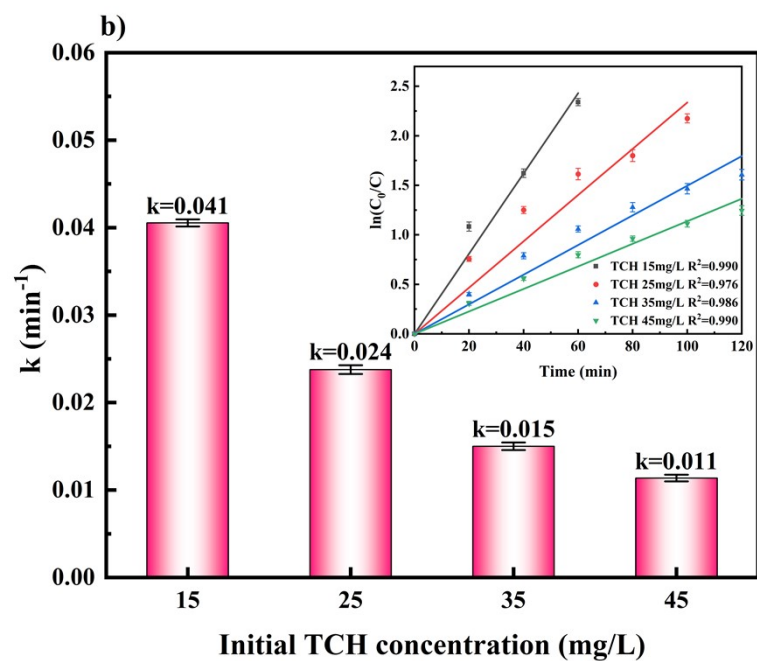

Fig. S4. (a) The effect of initial TCH concentration on degradation, and (b) its reaction kinetics

(Experimental conditions:  $[\text{PMS}] = 0.9 \text{ mM}$ ,  $[0.5\text{-CeO}_2/\text{CuCo}_2\text{S}_4] = 90 \text{ mg/L}$ , initial pH unadjusted (5.6), and temperature =  $20^\circ\text{C}$ ).

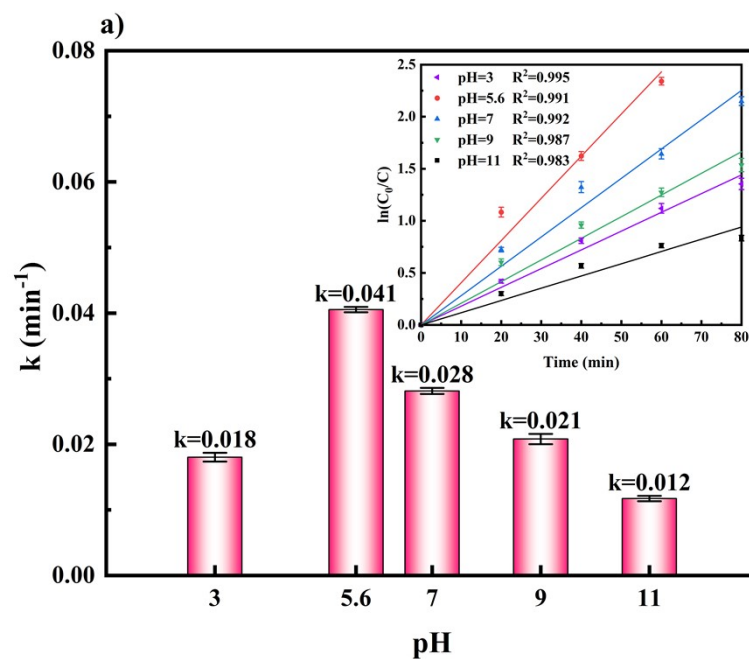

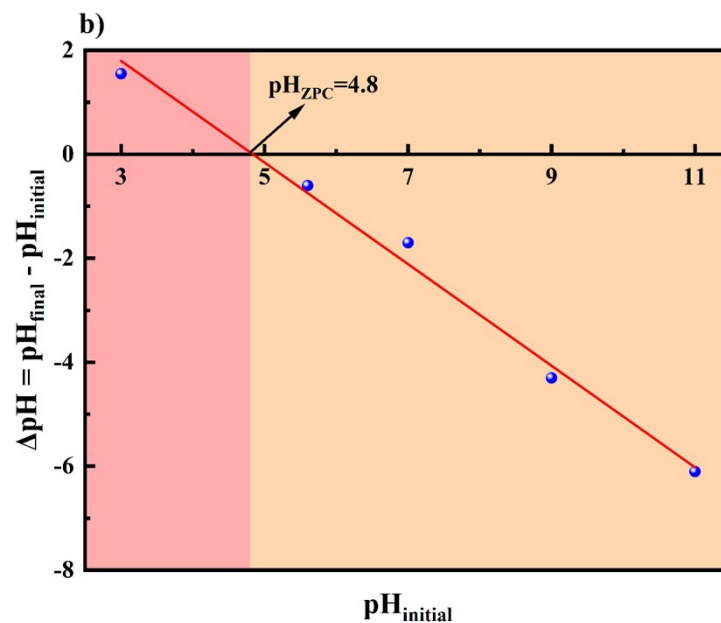

Fig. S5. (a) Corresponding constant rate ( $k$ ), (b) the point of zero charge of 0.5-CeO<sub>2</sub>/CuCo<sub>2</sub>S<sub>4</sub>.  
(Experimental conditions: [TCH] = 15 mg/L, [PMS] = 0.9 mM, [0.5-CeO<sub>2</sub>/CuCo<sub>2</sub>S<sub>4</sub>] = 90 mg/L, temperature = 20°C.)

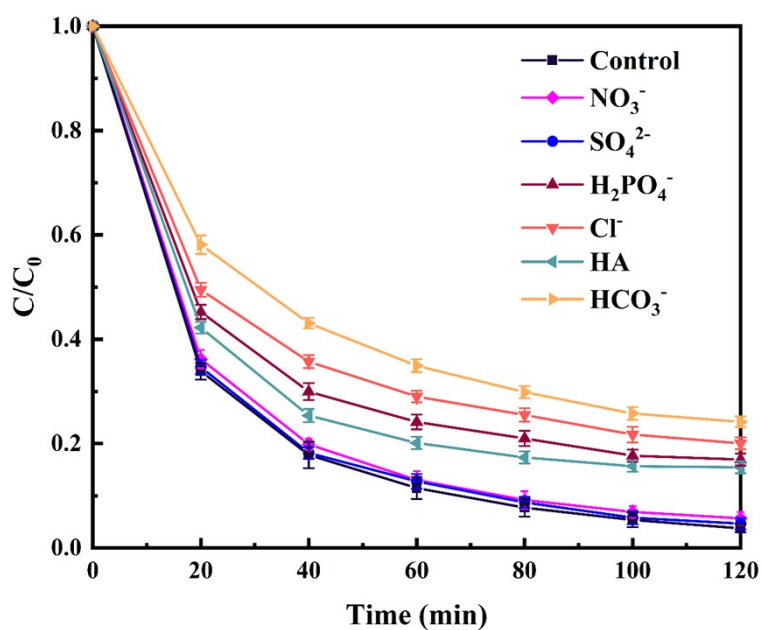

Fig. S6. The influence of inorganic anions and humic acids on the degradation effect of TCH  
(Experimental conditions: [TCH] = 15 mg/L, [PMS] = 0.9 mM, [0.5-CeO<sub>2</sub>/CuCo<sub>2</sub>S<sub>4</sub>] = 90 mg/L, [Anion] = 5 mM, [HA] = 20 mg/L, initial pH unadjusted (5.6), temperature = 20°C.)

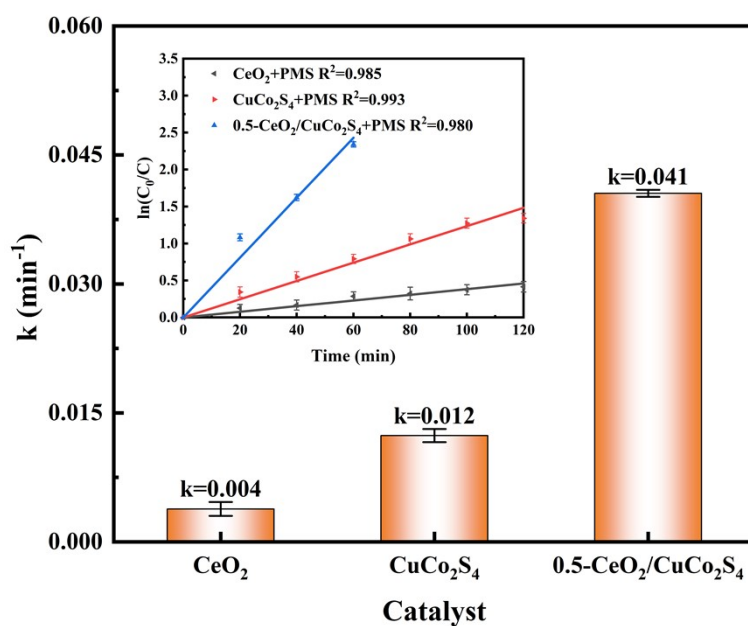

Fig. S7. The reaction rate constants ( $k$ ) of TCH degradation in different systems. (Experimental conditions:  $[\text{TCH}] = 15 \text{ mg/L}$ ,  $[\text{PMS}] = 0.9 \text{ mM}$ ,  $[\text{CeO}_2] = 20 \text{ mg/L}$ ,  $[\text{CuCo}_2\text{S}_4] = 70 \text{ mg/L}$ ,  $[0.5\text{-CeO}_2/\text{CuCo}_2\text{S}_4] = 90 \text{ mg/L}$ , initial pH unadjusted (5.6), and temperature =  $20^\circ\text{C}$ ).

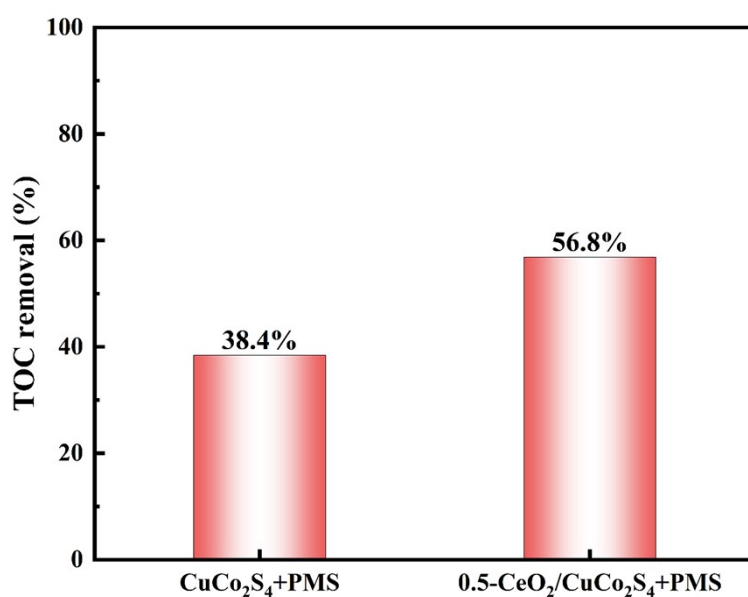

Fig. S8. TOC removal efficiency (Experimental conditions:  $[\text{TCH}] = 15 \text{ mg/L}$ ,  $[\text{PMS}] = 0.9 \text{ mM}$ ,  $[\text{CuCo}_2\text{S}_4] = 70 \text{ mg/L}$ ,  $[0.5\text{-CeO}_2/\text{CuCo}_2\text{S}_4] = 90 \text{ mg/L}$ , initial pH unadjusted (5.6), and temperature =  $20^\circ\text{C}$ ).



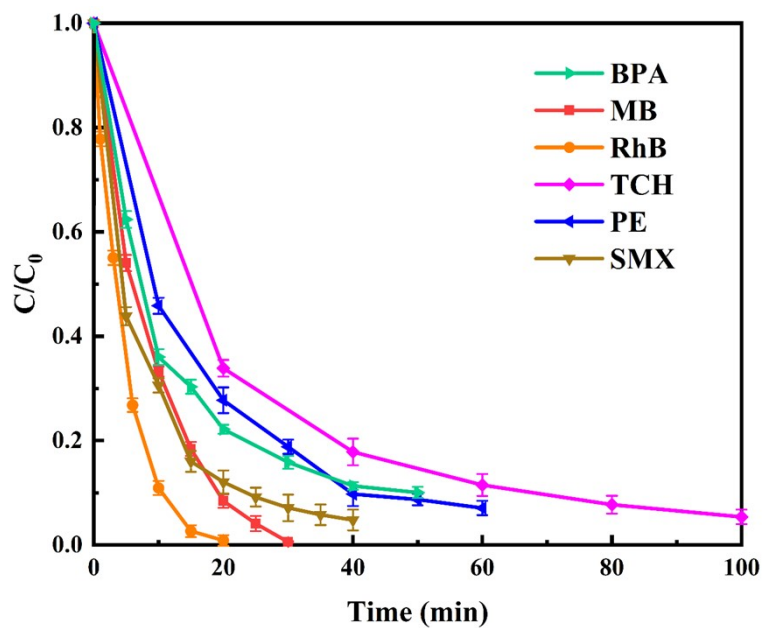

Fig. S9 0.5-CeO<sub>2</sub>/CuCo<sub>2</sub>S<sub>4</sub> composite catalyst utility experiment (Experimental conditions: [Contaminant] = 15 mg/L, [PMS] = 0.9 mM, [0.5-CeO<sub>2</sub>/CuCo<sub>2</sub>S<sub>4</sub>] = 90 mg/L, initial pH unadjusted (5.6), and temperature = 20°C.)

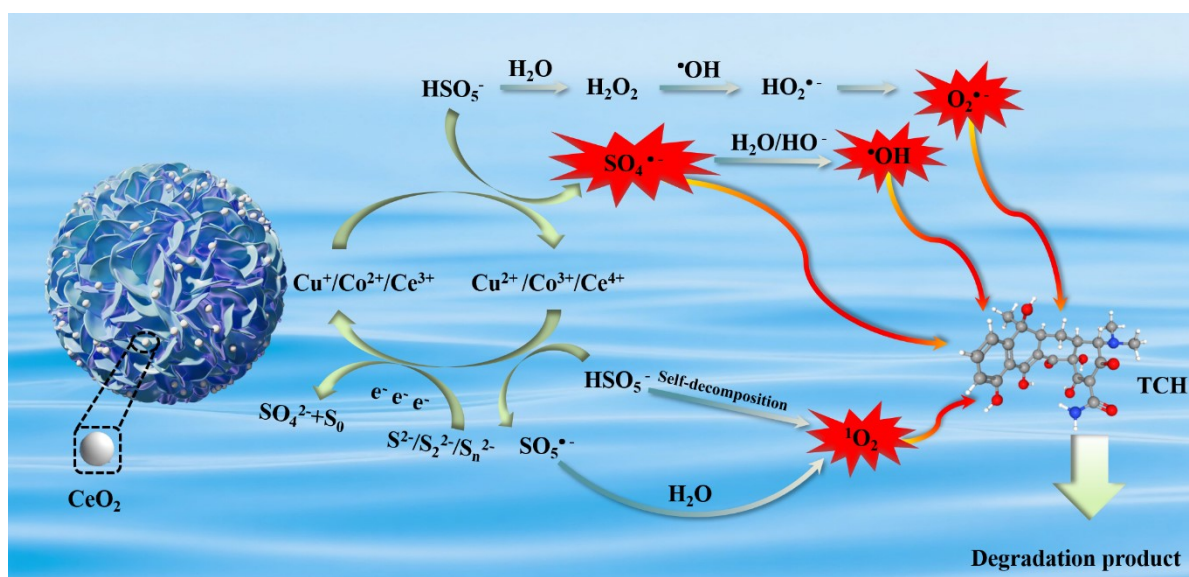

Fig. S10 The possible synergistic mechanisms of 0.5-CeO<sub>2</sub>/CuCo<sub>2</sub>S<sub>4</sub>.

Table S1. The structural parameters of the sample preparation

| Sample                                                 | Specific Surface         | Pore Volume          | Average Mesopore |
|--------------------------------------------------------|--------------------------|----------------------|------------------|
|                                                        | Area (m <sup>2</sup> /g) | (cm <sup>3</sup> /g) | Diameter (nm)    |
| CeO <sub>2</sub>                                       | 21.50                    | 0.077                | 14.23            |
| CuCo <sub>2</sub> S <sub>4</sub>                       | 3.79                     | 0.013                | 14.16            |
| 0.5-CeO <sub>2</sub> /CuCo <sub>2</sub> S <sub>4</sub> | 8.37                     | 0.027                | 13.08            |

Table S2. Comparison of activation energies of multiphase catalytic systems.

| Catalyst                                           | Organics    | Ea (kJ/mol) | Ref.      |
|----------------------------------------------------|-------------|-------------|-----------|
| FePc@PAN                                           | TCH         | 64.41       | 1         |
| Fe <sub>2</sub> O <sub>3</sub>                     | Rhodamine B | 69.2        | 2         |
| 3D nitrogen-doped graphene aerogels<br>(NGA)       | ibuprofen   | 78.8        | 3         |
| nitrogen-doped graphene (NG)                       | phenol      | 96.6        | 4         |
| CoFe <sub>2</sub> O <sub>4</sub> /TNTs             | MB          | 70.56       | 5         |
| graphene oxide                                     | phenol      | 84.0        | 6         |
| MgCoAl                                             | MB          | 70.81       | 7         |
| CeO <sub>2</sub> /CuCo <sub>2</sub> S <sub>4</sub> | TCH         | 56.6        | This work |

## Reference

1. F. Zhang, J. Xin, X. Wu, J. Liu, L. Niu, D. Wang, X. Li, C. Shao, X. Li and Y. Liu, *J. Hazard. Mater.*, 2023, **459**, 132228.
2. F. Ji, C. Li, X. Wei and J. Yu, *Chem. Eng. J.*, 2013, **231**, 434–440.
3. J. Wang, X. Duan, Q. Dong, F. Meng, X. Tan, S. Liu and S. Wang, *Carbon*, 2019, **144**, 781–790.
4. C. Wang, J. Kang, H. Sun, H. M. Ang, M. O. Tadé and S. Wang, *Carbon*, 2016, **102**, 279–287.
5. Y. Ren, L. Lin, J. Ma, J. Yang, J. Feng and Z. Fan, *Appl. Catal. B Environ*, 2015, **165**, 572–578.
6. H. Sun, S. Liu, G. Zhou, H. M. Ang, M. O. Tadé and S. Wang, *ACS Appl. Mater. Interfaces*, 2012, **4**, 5466–5471.
7. J. a. Sun, L. Wang, Y. Wang, W. Lv and Y. Yao, *Chemosphere*, 2022, **286**, 131640.
